# Supplementary material
Source: MDPI journal article supplement (https://www.mdpi.com/2073-4352/08/01/23)
Supplement: s1 [file s1]

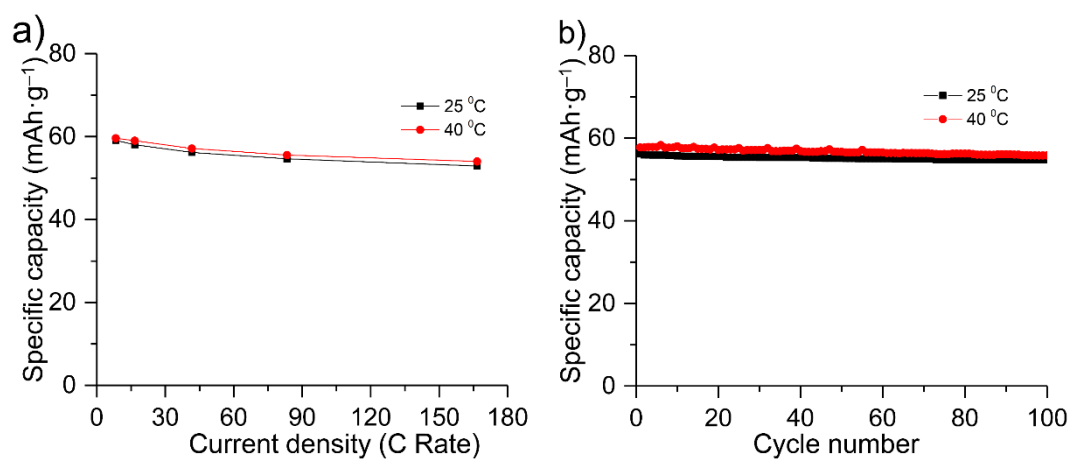

**Figure S1.** Rate performance (a) and cycling performance (b) of  $1_{\text{frame}}$  at different temperatures.

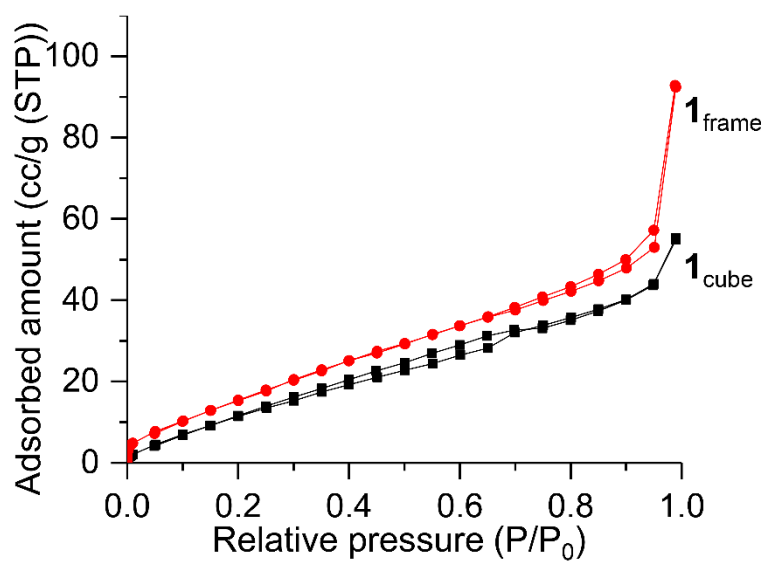

**Figure S2.** N<sub>2</sub> adsorption-desorption isotherms of 1 crystals.

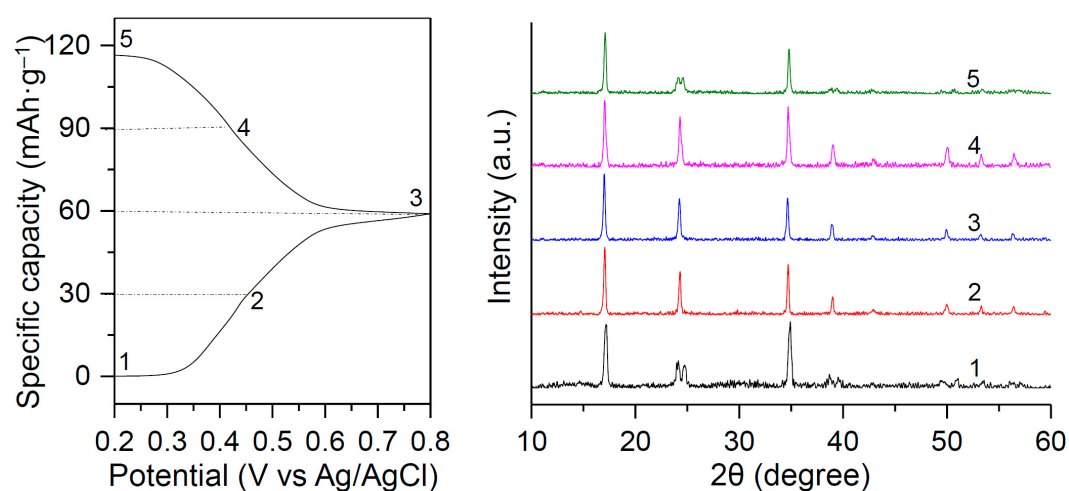

**Figure S3.** *ex situ* PXRD patterns of the electrochemically activated cubic crystals at charge/discharge during the first cycle at a current density of 0.07A·g<sup>-1</sup>.

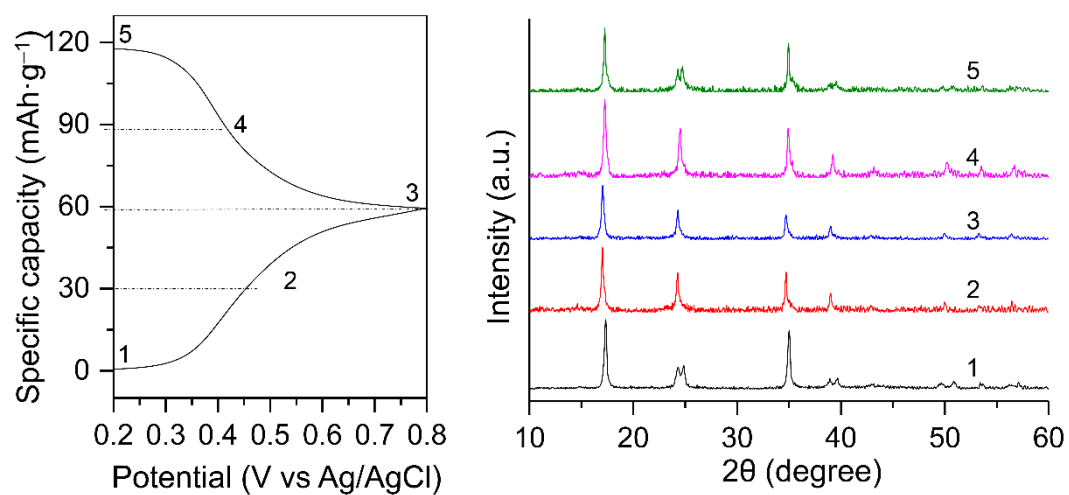

**Figure S4.** *ex situ* PXRD patterns of the electrochemically activated mesoframes at charge/discharge during the first cycle at a current density of 0.07A·g<sup>-1</sup>.

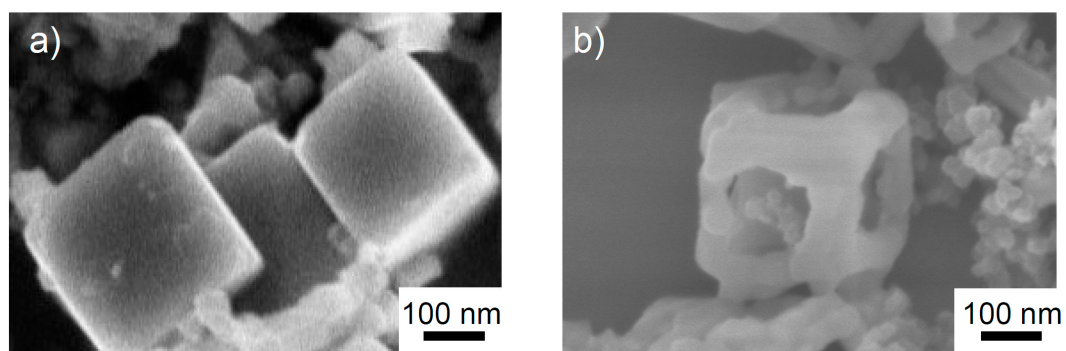

**Figure S5.** (a) SEM of cubic crystals after cycling. (b) SEM of mesoframes after cycling for 500 cycles.

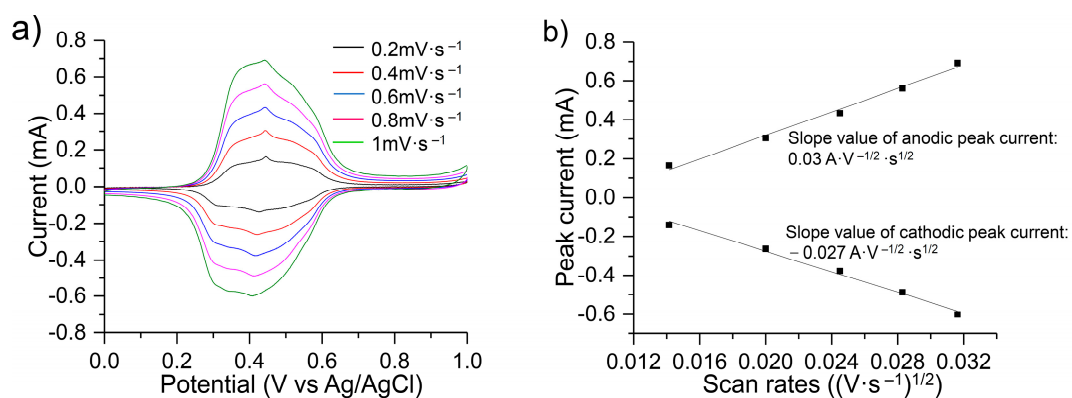

**Figure S6.** (a) Cyclic voltammetry curves of  $1_{\text{cube}}$  at various scanning rate (b) the anodic and cathodic peak currents as functions of the square root of scanning rates.

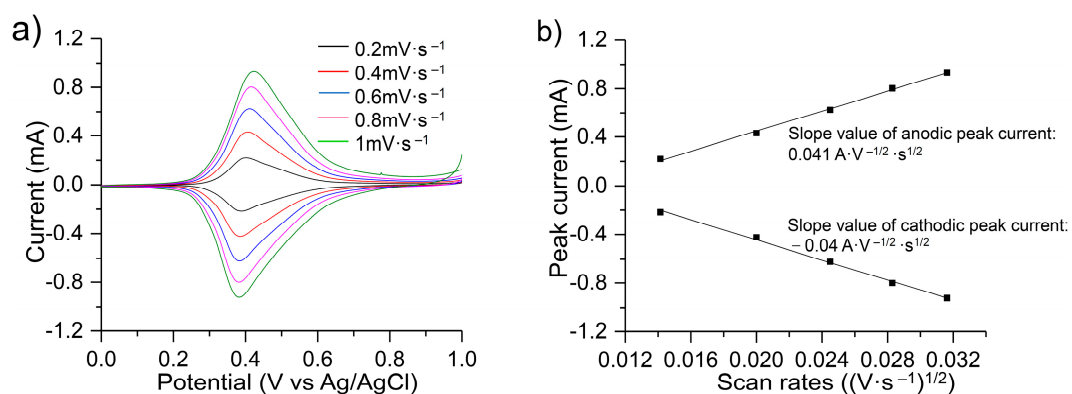

**Figure S7.** (a) Cyclic voltammetry curves of **1**<sub>frame</sub> at various scanning rate (b) the anodic and cathodic peak currents as functions of the square root of scanning rates.

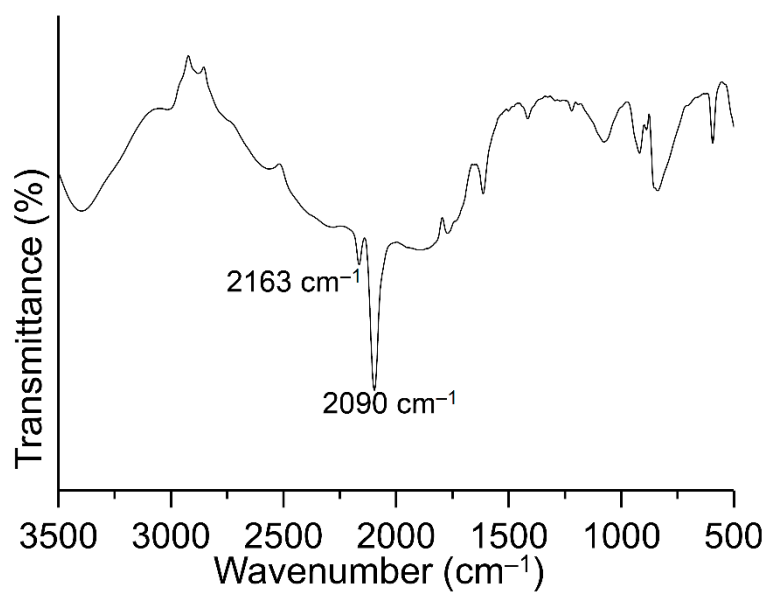

**Fig S8.** FT-IR Spectrum of mesoframes before electrochemical activation.

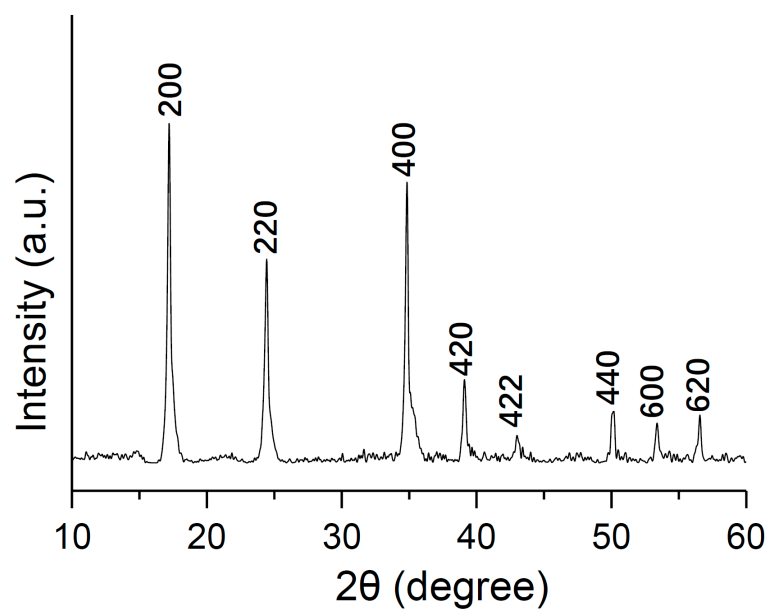

163

164

**Fig S9.** PXRD patterns of mesoframes before electrochemical activation.
